# Supplementary material for: The catalytic activity and mechanism of oxygen reduction reaction on P-doped MoS2
Source: Royal Society of Chemistry journal article supplement (doi:10.1039/c8cp01294f), 2018-01-01
Supplement: c8cp01294f1.pdf [file c8cp01294f1.pdf]

# Supporting Information

## The catalytic activity and mechanism of oxygen reduction reaction on P-doped MoS<sub>2</sub>

Xiaoming Zhang<sup>1,2</sup>, Shaodong Shi<sup>1</sup>, Tianwei Gu, Leyi Li<sup>1</sup>, Shansheng Yu<sup>1\*</sup>

<sup>1</sup>State Key Laboratory of Automotive Simulation and Control, Department of Materials Science, Jilin University, Changchun 130012, China

<sup>2</sup>Division of Fuel Cell & Battery, Dalian National Laboratory for Clean Energy, Dalian Institution of Chemical Physics, Chinese Academy of Sciences, Dalian 116023, China

**Keywords:** MoS<sub>2</sub>, single-atom dope, Phosphorus, DFT, ORR mechanism

\* Corresponding author: Shansheng Yu, E-mail: yuss@jlu.edu.cn

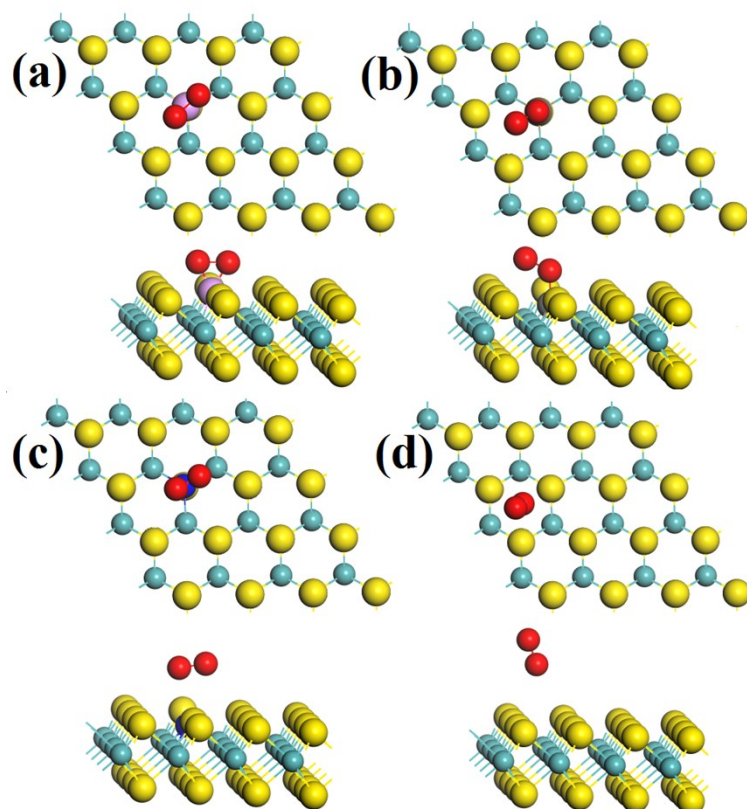

**Figure S1** The different kinds of possible adsorption geometries of  $O_2$ .

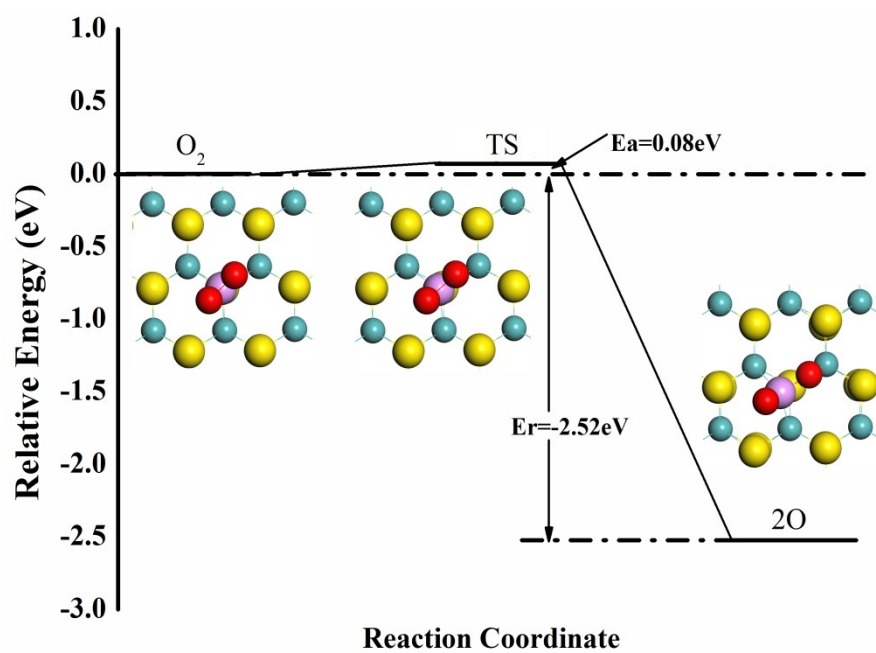

**Figure S2** The dissociation step of the oxygen molecule.

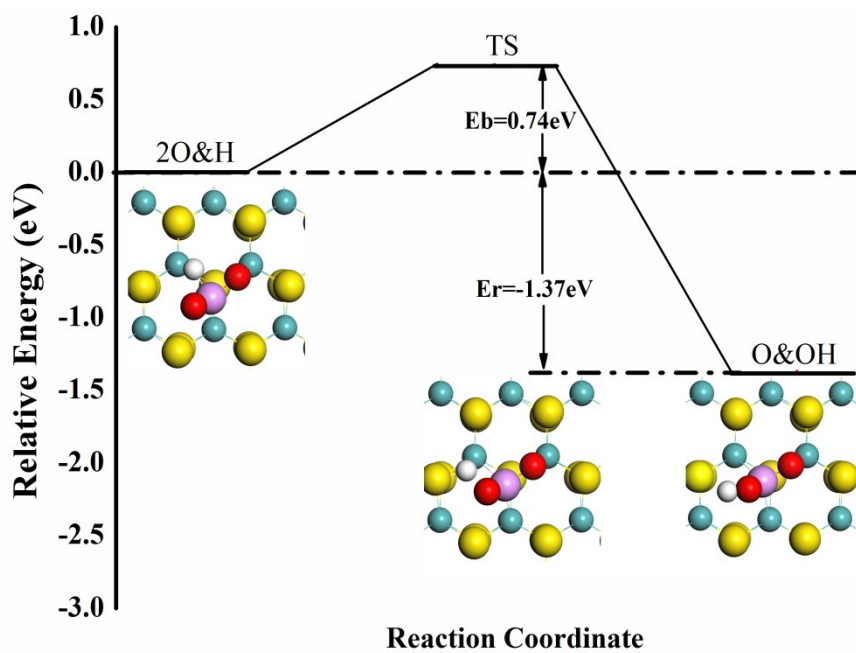

**Figure S3** The first hydrogenation step of two atomic O.

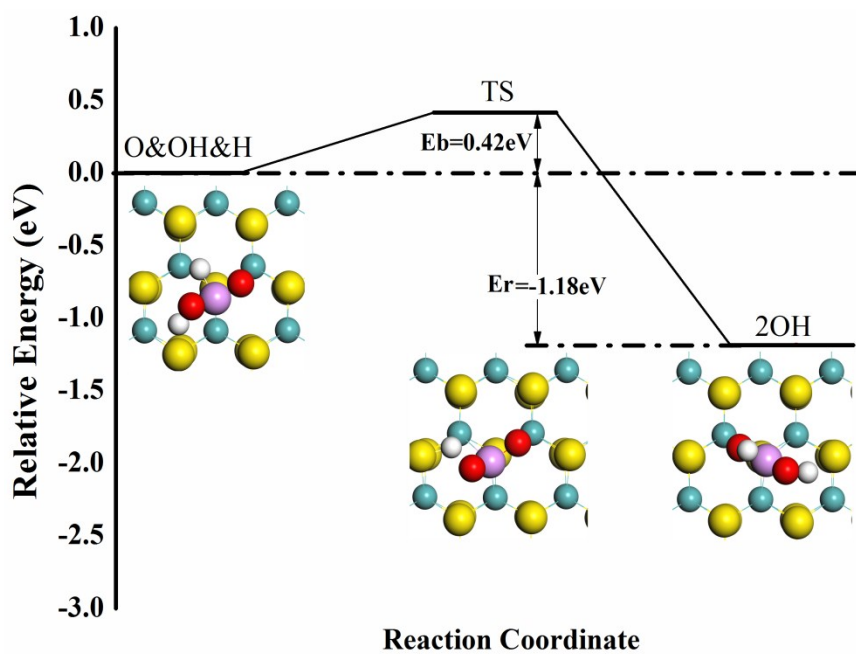

**Figure S4** The second hydrogenation step of two atomic O and the formation of two OH species.

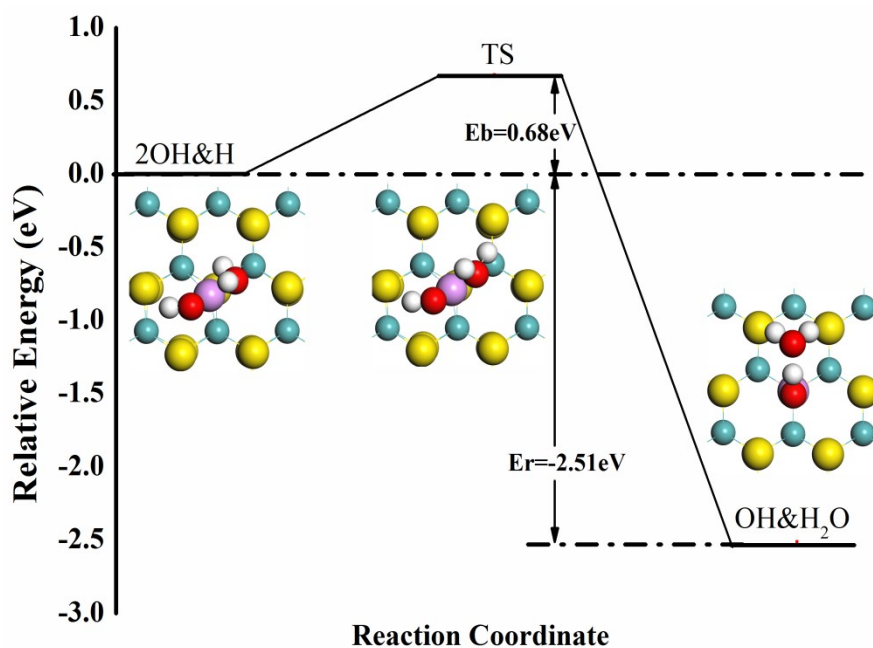

**Figure S5** The hydrogenation process of two OH species and the formation of the H<sub>2</sub>O from the hydrogenation of the OH, and the release of the H<sub>2</sub>O.

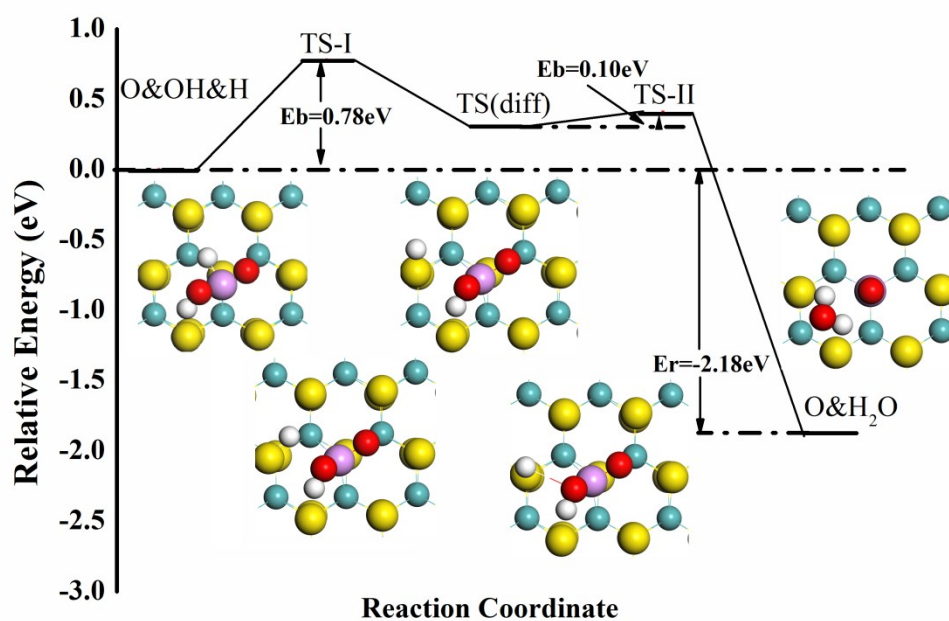

**Figure S6** The diffusion of the H atom from the P-Mo bridge site to the S atom near to P and the formation of the H<sub>2</sub>O from the hydrogenation of the OH, and the release of the H<sub>2</sub>O.

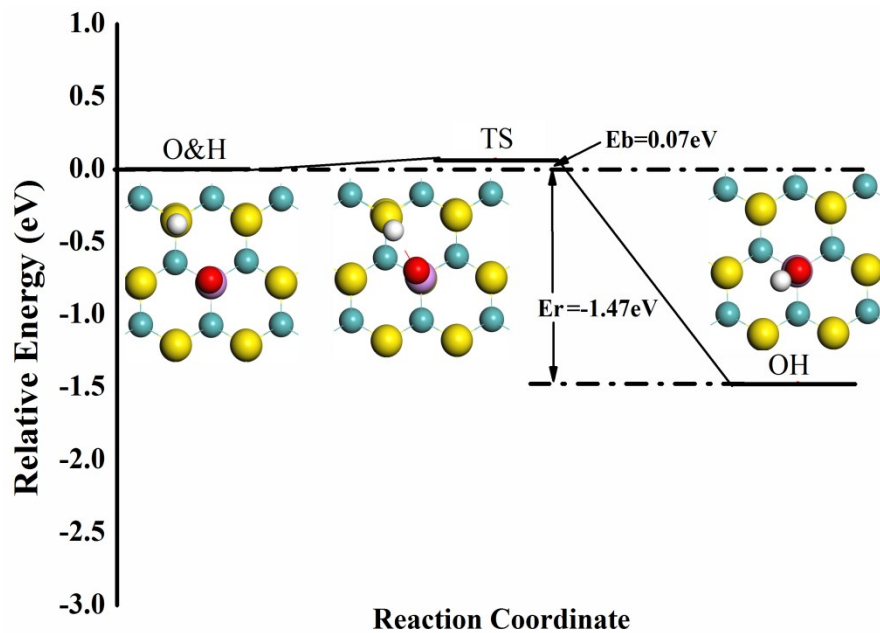

**Figure S7** The hydrogenation process of the adsorbed O and the formation of the OH species.

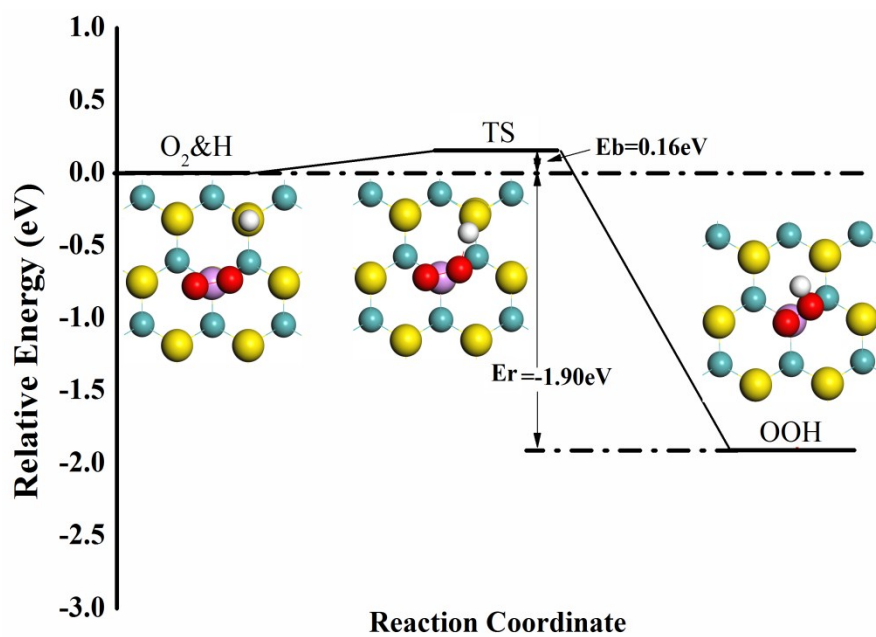

**Figure S8** The hydrogenation step of the oxygen molecule and the formation of the OOH species.

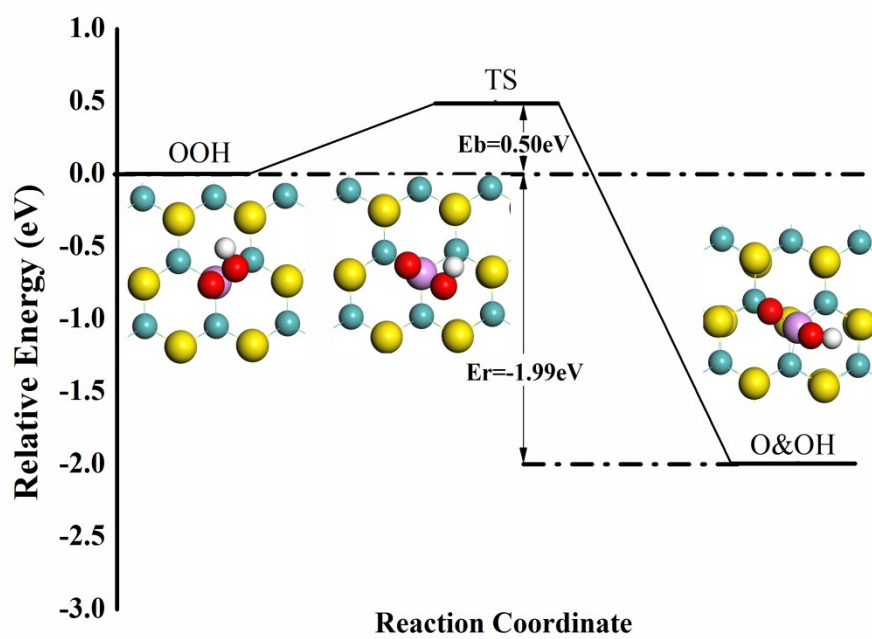

**Figure S9** The dissociation of the OOH species into atomic O and OH.
